1 The pro-apoptotic action of the peptide hormone, *Neb*-colloostatin, on insect haemocytes

2

3 Czarniewska E.<sup>1\*</sup>, Mrówczyńska L.<sup>2</sup>, Kuczer M.<sup>3</sup>, Rosiński G<sup>1</sup>.

4

5 <sup>1</sup>Department of Animal Physiology and Development, Institute of Experimental Biology,  
6 Adam Mickiewicz University, Umultowska 89, 61-614 Poznań, Poland.

7 <sup>2</sup>Department of Cell Biology, Institute of Experimental Biology, Adam Mickiewicz  
8 University, Umultowska 89, 61-614 Poznań, Poland.

9 <sup>3</sup>Faculty of Chemistry, Wrocław University, Joliot-Curie 14, 50-383 Wrocław, Poland

10

11 \* Author for correspondence (czarniew@amu.edu.pl)

12

13 Short title: The pro-apoptotic action of *Neb*-colloostatin

14

15 Key words: insect haemocytes; *Neb*-colloostatin; apoptosis

16

17 **SUMMARY**

18 The gonadoinhibitory peptide hormone, *Neb*-colloostatin, was first isolated from ovaries of  
19 the flesh fly *Neobellieria bullata*. This 19-mer peptide is thought to be a cleaved product of a  
20 collagen-like precursor molecule that is formed during remodelling of the extracellular  
21 matrix. In this study, we report that upon injection of pico- and nanomolar doses, this peptide  
22 exerts a pro-apoptotic action on haemocytes of *Tenebrio molitor* adults, as visualized by  
23 changes in morphology and viability. The F-actin cytoskeleton was found aggregating into  
24 distinctive patches. This may be responsible for the observed inhibition of adhesion of  
25 haemocytes and for the stimulation of filopodia formation. However, *Neb*-colloostatin  
26 injection did not induce the formation of autophagic vacuoles. Our results suggest that  
27 physiological concentrations of *Neb*-colloostatin may play an important role in controlling the  
28 quantity and activity of haemocytes in insect haemolymph. They also suggest that in periods  
29 that *Neb*-colloostatin is released, this peptide may cause a weakening of the insects' immune  
30 system. This is the first report that exposure to a peptide hormone causes apoptosis in insect  
31 haemocytes.

32

33 **INTRODUCTION**

34 Insect haemocytes engage in immune responses that integrate humoral and cellular  
35 components to eliminate pathogens. Cellular immune reactions can be modulated by various  
36 endogenous factors such as: eicosanoides (Franssens et al., 2005), biogenic amines (Baines et  
37 al., 1992), 20-hydroxyecdysone and juvenile hormone (Franssens et al., 2006). Injection of  
38 ecdysone into mid- third-instar *Drosophila melanogaster* larvae made plasmatocytes  
39 differentiate into actively phagocytosing macrophages. This hormone was also shown to be  
40 necessary for post-embryonic haematopoiesis and to stimulate the encapsulation of parasites  
41 (Lanot et al., 2001; Sorrentino et al., 2002). In contrast, injection of juvenile hormone  
42 suppressed the encapsulation response in *Tenebrio molitor* (Rantala et al., 2003). The *in vivo*  
43 effects of some peptide hormones on nodule formation and on the activation of the  
44 prophenoloxidase cascade in insect haemolymph have also been studied. In *Locusta*  
45 *migratoria*, Goldsworthy et al. (2002; 2003a; 2003b) showed that co-injection of adipokinetic  
46 hormone-I (*Lom*-AKH-I) with immunogens such as the bacterial lipopolysaccharide (LPS) or  
47  $\beta$ -1,3-glucan (laminarin) stimulated nodule formation in larval and adult locusts. It also  
48 activated prophenoloxidase activity in the haemolymph of sexually mature adults. Eicosanoid  
49 synthesis is important for nodule formation, but not for increasing the phenoloxidase activity.  
50 In addition, Skinner et al. (1997) detected allatostatin-like immunoreactive material in

51 haemocytes of the cockroach *Diploptera punctata*. Franchini et al. (1996) reported the  
52 presence of adrenocorticotropin hormone (ACTH)-like molecules in haemocytes of newly  
53 enclosed *Calliphora vomitoria* adults. The presence of these molecules in haemocytes  
54 suggested some as yet unknown regulatory role. Altogether, there is some evidence for the  
55 interaction between the endocrine and the immune systems, but it is far from complete.  
56 Further analysis is required to yield more insight into the involvement of the endocrine system  
57 in the regulation of haemocyte populations and cellular immunity.

58 In a screen for other biologically active peptide hormones, the influence of *Neb*-  
59 colloostatin, a gonadoinhibitory peptide with pleiotropic activity in insects, on haemocytes  
60 has been studied. *Neb*-colloostatin is, unlike most insect peptide hormones, not a  
61 neuropeptide. It is thought to be a cleaved product of a collagen-like precursor molecule that  
62 is formed during remodelling of the extracellular matrix (De Loof et al., 1995). Upon  
63 injection, it inhibits ovarian development in the flesh fly *N. bullata* (Bylemans et al., 1995)  
64 and in the mealworm *T. molitor* (Kuczer et al., 2007). It inhibits oocyte growth, it reduces the  
65 number of eggs and their hatchability, and it delays the embryonic development in *T. molitor*  
66 (Wasielewski and Rosiński, 2007). Bylemans et al. (1995) showed that *Neb*-colloostatin  
67 inhibits vitellogenin biosynthesis, but that this effect is not mediated by inhibiting trypsin- or  
68 ecdysone biosynthesis.

69 In this study, a new physiological effect of *Neb*-colloostatin in insects was detected, namely a  
70 pro-apoptotic action on haemocytes of *T. molitor* adults.

71

## 72 **MATERIALS AND METHODS**

### 73 **Insects**

74 A stock culture of *T. molitor* was maintained at the Department of Animal Physiology and  
75 Development as described previously (Rosiński et al., 1979). Studies were carried out on 4-  
76 days old adult beetles. As the mealworm parents' age is important for the developmental  
77 features of their offspring (Ludwig and Fiore, 1960; Ludwig et al., 1962; Rosinski, 1995), all  
78 insects in our experiments derived from less than 1 month old parents.

79

80

### **Peptide synthesis**

81 *Neb*-colloostatin was synthesized by the classical solid phase method based on the Fmoc-  
82 protocol (Fields and Nobel, 1990) as described previously (Kuczer et al., 2004). Briefly,  
83 amino acids were assembled on a 9-fluorenylmethoxycarbonyl-Arg(2,2,5,7,8-  
84 pentamethylchromane-6-sulfonyl)-Wang resin. 2-(1H-benzotriazole-1-yl)-1,1,3,3,-

85 tetramethyluronium hexafluorophosphate (HBTU) in the presence of 1-hydroxybenzotriazole  
86 (HOBt) and *N*-ethylmorpholine (NEM) were used as coupling reagents. The *N*-Fmoc group  
87 was removed with 20% piperidine in *N,N*-dimethylformamide (DMF). The peptide-resin was  
88 cleaved with trifluoroacetic acid (TFA) in the presence of ethanedithiol (EDT). The peptide  
89 was purified by preparative high performance liquid chromatography on a Varian ProStar,  
90 column: Tosoh Biosciences ODS-120T C18 (ODS 300 × 21.5 mm). Analytical HPLC was  
91 performed on a Thermo Separation Products HPLC system with a Vydac C18 column (ODS  
92 250×4.6 mm) with a linear gradient 0–100% B in A (A - 0.1% aqueous TFA, B - 80%  
93 acetonitrile in water, containing 0.1% TFA) for 60 min at a flow rate of 1 ml/min with UV  
94 absorption determined at 210 nm. The molecular weight of the peptide was determined with a  
95 Bruker Daltonics microTOF-Q mass spectrometer. The final product purity was checked by  
96 HPLC, TLC, optical activity and molecular weight determinations. Analytical HPLC was  
97 performed on a Thermo Separation Products HPLC system with a Vydac C18 column (ODS  
98 250 4.6 mm) with a linear gradient 0–100% B in A for 60 min at a flow rate of 1 ml/min with  
99 the UV absorption determined at 210 nm. The optical activity of the chiral compound was  
100 measured with a Jasco DIP-1000 polarimeter (Jasco). TLC was performed on the aluminum  
101 sheets precoated with silica gel 60 from Merck.

102 The peptide was dissolved in physiological saline for *Tenebrio* (274 mM NaCl, 19  
103 mM KCl, 9 mM CaCl<sub>2</sub>) (Rosiński, 1995) to yield a stock solution of 1 mM, and it was stored  
104 at -30 °C. The working dilutions from the stock solution were made in saline.

105

#### 106 **Injection procedure, haemolymph collection**

107 The beetles were anaesthetised with CO<sub>2</sub>, washed in distilled water and disinfected with 70%  
108 ethanol. *Neb*-colloostatin was injected (2 µl, in dose of 1 or 10 nmole of *Neb*-colloostatin per  
109 insect) through the ventral membrane between the second and the third abdominal segments  
110 towards the head with a Hamilton syringe (Hamilton Co.). The control insects were injected  
111 with the same volume of physiological saline. All solutions were sterilised through the 0.22  
112 µm pore filter membrane (Millipore) and all injections were performed in sterile conditions.

113 Before haemolymph collection, the beetles were anaesthetised again with CO<sub>2</sub>, washed  
114 in distilled water and disinfected with 70% ethanol. Both control and injected insects were  
115 taken 1 hour after injection, and the haemocytes were prepared for the living- as well as for  
116 the fixed conditions. Upon cutting off a tarsus from a foreleg, haemolymph samples (5 µl),  
117 were collected with “end to end” microcapillaries (Drummond). They were diluted in 20 µl of

118 ice-cold physiological saline containing anticoagulant buffer (4.5 mM citric acid and 9 mM  
119 sodium citrate) in a 5:1 v/v ratio.

120 Haemolymph from control- and from peptide-injected insects was dropped on alcohol-  
121 cleaned cover glasses coated with 7  $\mu$ l 0.01% poly-L-lysine (Sigma P4707). After allowing  
122 haemocytes to settle (15 min, at room temperature), the remaining fluid was removed and the  
123 remaining cells were washed twice with physiological saline. Fixation was achieved in 4%  
124 paraformaldehyde. The prepared haemocytes were used for the appropriate microscopic  
125 analysis (mitochondrial staining, activation of caspases, F-actin microfilament staining and  
126 detection of autophagic vacuoles).

127

### 128 **The *Neb*-colloostatin *in vitro* haemocyte' assay**

129 Control haemocytes were incubated in physiological saline, whereas the experimental  
130 haemocytes were incubated in 1 nM or 10 nM *Neb*-colloostatin solutions for 1h at RT. Next,  
131 haemocytes were fixed in 4% paraformaldehyde for 10 min at room temperature, and washed  
132 twice with physiological solution. The haemocytes were stained for activated caspase activity  
133 as described below, and the percentage of apoptosing cells was scored. In addition, the *in*  
134 *vitro* peptide-treated haemocytes were stained with mono-dansyl-cadaverin (MDC) to show  
135 the autophagic vacuoles).

136

### 137 **Assay for active mitochondria**

138 To label mitochondria, both the control- and the haemocytes of insects injected with peptide  
139 were incubated with 700 nM MitoTracker<sup>®</sup>Green FM (Invitrogen) in physiological solution  
140 for 30 min at room temperature in the dark. After staining, the haemocytes were washed twice  
141 with the physiological saline and they were immediately examined with a Nikon Eclipse TE  
142 2000-U fluorescence microscope. The images were made with a Nikon DS-1QM digital  
143 camera.

144

### 145 ***In situ* assay for activated caspases, detection of F-actin microfilaments and 146 counterstaining of the nucleus**

147 The presence of active caspases was searched for by using a sulphorhodamine derivative of  
148 valylalanyl aspartic acid fluoromethyl ketone, a potent inhibitor of caspase activity (SR-VAD-  
149 FMK) (in accordance to the manufacturer's instructions of the sulphorhodamine multi-  
150 caspase activity kit, AK-115, BIOMOL, PA). Haemolymph samples from control- and from  
151 4-day old insects injected with *Neb*-colloostatin were dropped on poly-L-lysine-coated cover

152 slips (18 x 18 mm) and haemocytes were allowed to adhere for 15 min. Next, they were  
153 rinsed with physiological saline, incubated in reaction medium (1/3x SR-VAD-FMK) for 1 h  
154 at room temperature in the dark, rinsed again three times with wash buffer for 5 min at room  
155 temperature and finally fixed in 3.7% paraformaldehyde for 10 min. The prepared haemocytes  
156 were studied with a Zeiss LSM 510 confocal laser scanning microscope with filters set for  
157 rhodamine (excitation 543 nm and emission 560 nm) and the percentage of the apoptosing  
158 cells was scored.

159 For visualizing F-actin microfilaments, haemocytes that had first been stained for  
160 caspase activity as described above were permeabilized in 3.7% paraformaldehyde in  
161 physiological saline containing 0.1% Triton X-100 for 5 min at room temperature. Next, the  
162 haemocytes were washed in physiological saline and stained with Oregon Green<sup>®</sup> 488  
163 phalloidin (Invitrogen) for 20 min at room temperature in the dark, in accordance to the  
164 manufacturer's instructions. After washing again in physiological saline, the haemocytes were  
165 stained with freshly prepared solutions of Hoechst-33258 (Invitrogen) in physiological saline.  
166 Incubation in the dark lasted for 5 min. Thereafter, the haemocytes were washed once with  
167 distilled water, they were mounted using a mounting medium, and examined with a Nikon  
168 Eclipse TE 2000-U fluorescence microscope.

169

#### 170 **Mono-dansyl-cadaverine (MDC) staining for autophagic vacuoles**

171 Autophagic vacuoles were searched for with the mono-dansyl-cadaverin (MDC) staining,  
172 according to the method of Biederbick et al. (1995). Cover slips with adhering haemocytes  
173 were washed with physiological saline and incubated with 0.05 mM MDC for 15 min at room  
174 temperature in the dark. Next, haemocytes were washed three times with physiological saline.  
175 The percentage of MDC-positive cells was performed immediately after preparation using a  
176 Nikon Eclipse TE 2000-U fluorescence microscope.

177

## 178 **RESULTS**

179 Our first marker of proapoptotic activity was activation of caspases. One hour after injection  
180 of *Neb*-colloostatin injection in a dose of 1 or 10 nmole per insect, caspase activity (1-9) has  
181 been detected (Fig. 1B, C, E, F). The degree of activation depended on the applied hormone  
182 dose. In all studied individuals, injection of 10 nmole of peptide caused the activation of  
183 caspases in all haemocytes (Fig. 1F), whereas in insects injected with 1 nmole of *Neb*-  
184 colloostatin about 67% of haemocytes displayed caspase activity (Fig. 1E). Moreover,

185 exposure to *Neb*-colloostatin induced in the haemocytes malformations that are typical for an  
186 apoptotic morphology, such as cell shrinkage, rounding up and extensive membrane blebbing  
187 (Fig. 1F). The *in vitro* bioassay on haemocytes glued to cover slips confirmed the pro-  
188 apoptotic activity of *Neb*-colloostatin. The 1 nM solution of this peptide was very potent: it  
189 activated caspases in 100% of the haemocytes (Fig. 2).

190 The second marker concerned changes in mitochondrial membrane potential. Our  
191 fluorescence microscopy analysis revealed that *Neb*-colloostatin injections resulted in the loss  
192 of mitochondrial membrane potential as shown in Fig. 1H.

193 As to our third marker, namely rearrangements in the cytoskeleton, these could be  
194 visualized upon staining the actin cytoskeletal network distribution and arrangement with  
195 Oregon Green<sup>®</sup> 488 phalloidin. As shown in Fig. 1A, control haemocytes formed extensive  
196 filopodia, in which the F-actin microfilaments were detected after the cells had been allowed  
197 to adhere to the cover slips for 15 min. Injection of *Neb*-colloostatin in a dose of 1 nmole per  
198 individual resulted in the accumulation of large F-actin aggregates (Fig. 1B) and in the  
199 formation of membrane blebs (Fig. 1C). In control haemocytes no membrane blebs have been  
200 observed. In the *in vivo* experiment, changes in F-actin distribution after 1 hour treatment with  
201 *Neb*-colloostatin were so pronounced that the cells' morphology was drastically changed.  
202 Moreover, the peptide-stimulated haemocytes were less able to form pseudopodia in  
203 comparison to the control haemocytes.

204 In order to examine to which type of programmed cell death, type I or type II (see  
205 discussion), injection of *Neb*-colloostatin was causal, the MDC staining method was used for  
206 tracing the induction of autophagic vacuoles. The results in both the *in vivo* injection- and *in*  
207 *vitro* incubation experiments were negative as no autophagic vacuoles at all could be  
208 visualized (data not shown).

209

## 210 **DISCUSSION**

211 The novelty of this study is showing for the first time pro-apoptotic activity of *Neb*-  
212 colloostatin on the insect haemocytes.

213 Cells can respond to stress stimuli in a variety of ways ranging from activation of  
214 pathways that promote survival to eliciting programmed cell death or even the execution of  
215 necrotic cell death that eliminates damaged cells (Fulda et al., 2010). Programmed cell death  
216 can be classified into two major groups according to its morphological features: (1) type I of  
217 programmed cell death - apoptosis and (2) type II of programmed cell death - autophagic cell



218 death. Apoptosis can result from a genetic program regulating the cell number in  
219 physiological and pathological conditions. It can also be induced in response to environmental  
220 changes or exposures to the variety of stresses and cytotoxic drugs (Lee et al., 1997; Verheij  
221 et al., 1996; Zanke et al., 1996). Apoptosis is characterized by mitochondrial dysfunction,  
222 nuclear and cytoplasmic condensation, preservation of organelles from autophagic  
223 degradation, cell fragmentation into apoptotic bodies and removal of such bodies via  
224 phagocytosis. This process involves the activation of a family of cysteine proteases, caspases,  
225 which recognise and cleave cellular target proteins leading to cell death (Nicholson, 1999).

226 In the *in vivo* test, within 1 h after injection *Neb*-colloostatin (10 nmole peptide/insect)  
227 induced caspase activation as well as marked morphological changes. The haemocytes' ability  
228 to form filopodia during adhesion decreased significantly and, as a consequence, most  
229 haemocytes became round. *T. molitor* haemocytes start producing numerous circular blebs, a  
230 marker for disintegration, but they do not display autophagic activity. This haemocyte  
231 phenotype is similar to that observed in cell types undergoing type I of programmed cell  
232 death-apoptosis. Terahara et al. (2003), using *in vitro* experiments, described similar changes  
233 in the morphology of haemocytes of the Pacific oyster, *Crassostrea gigas*. The morphology  
234 was affected both Arg-Gly-Asp and Arg-Gly-Glu peptides.

235 Mitochondrial degeneration is another characteristic effect of *Neb*-colloostatin on *T.*  
236 *molitor* haemocytes. Mitochondria are involved in induction of apoptosis *via* caspase  
237 activation and cytochrome c release (Desagher and Martinou, 2000; Kluck et al., 1997). In  
238 some apoptotic systems, the loss of membrane polarization may be an early event in the  
239 apoptotic process that leads the release of apoptogenic factors and to loss of oxidative  
240 phosphorylation (Düßmann et al., 2003). In *T. molitor* haemocytes, *Neb*-colloostatin injection  
241 caused swelling of the mitochondria and loss of their membrane potential suggesting a  
242 permeabilizing effect on mitochondrial membranes. According to Gourlay et al. (2004),  
243 rearrangements of the F-actin cytoskeleton may be causal to such effects. It is known, that the  
244 cytoskeleton is responsible for mitochondrial movement within cells and for mitochondrial  
245 membrane potential maintenance. In insects injected with *Neb*-colloostatin, F-actin staining  
246 showed cytoskeletal disintegration, as indicated by the appearance of a number of intensively  
247 stained foci. The observed F-actin staining pattern is similar to the one achieved by treating  
248 rock oyster (*Saccostrea glomerata*) haemocytes with noradrenaline (Aladaileh et al., 2008).  
249 MAP-dependent F-actin rearrangement mediates membrane blebbing during stress-induced  
250 apoptosis contributing to cell death (Huot et al., 1998). Taken together, the increased caspase  
251 activity, the rearrangement of the F-actin cytoskeleton, the blebbing phenotype and the



252 disintegration of the hemocytes are indicative for a proapoptotic effect of *Neb*-colloostatin  
253 on haemocytes of *T. molitor*. Apoptosis is often linked to stress stimuli (for review see Gores  
254 et al., 1990; Mills et al., 1998).

255 A study performed earlier by Wasielewski and Rosiński (2007) showed that injection  
256 of approximately 2 mmole of *Neb*-colloostatin into *T. molitor* females on days 1, 2, 3 of the  
257 first reproductive cycle strongly inhibited ovarian growth and oocyte development. It should  
258 be noted that the peptide doses used in this work were significantly lower. The approximate  
259 blood volume of adult *T. molitor* blood amounts to 20  $\mu$ l. This means that the *Neb*-colloostatin  
260 concentrations in the haemolymph of the injected mealworms reached picomolar  
261 concentrations (50 or 500, respectively). This calculation shows that the studied peptide is  
262 very potent and that the effects we observed can be induced at physiological concentrations.  
263 As a consequence the effects are not pharmacological artefacts.

264 In general, the insect defence system against invading parasites and pathogens involves  
265 both cellular and humoral immune responses. To fight infection, haemocytes phagocytose,  
266 form nodules or encapsulate foreign invaders and they produce humoral defence molecules  
267 (for a review see: Lavine and Strand, 2002). Therefore, maintaining a correct number of  
268 healthy haemocytes is crucial for the insects' survival. The present study is the first to indicate  
269 that synthetic pro-apoptotic peptide *Neb*-colloostatin exerts a potent proapoptotic effect on *T.*  
270 *molitor* haemocytes that could disrupt their immunological functions. Moreover, the  
271 decreased ability of *Neb*-colloostatin-treated haemocytes to adhere and to form filopodia  
272 suggests impairment of adhesion of circulating haemocytes to sites of injury or infection.

273 In the literature, only few studies evidenced an immunomodulatory role of some peptide  
274 hormones. For example, it was found that plasmatocytes and granular cells of *Calliphora*  
275 *vomitaria* show immunoreactive ACTH and TNF- $\alpha$ -like molecules when they are activated  
276 and recruited into capsule formation, whereas the freely circulating plasmatocytes, are not  
277 involved in encapsulation and do not express these molecules. Moreover, ACTH-like  
278 molecules are also permanently present in phagocytosing haemocytes (Franchini et al. 1996).  
279 These authors suggested that ACTH-like molecules play a physiological role in capsule  
280 formation and could act as a chemoattractant to other haemocytes.

281 In cockroaches and crickets, inhibition of juvenile hormone biosynthesis by the corpora allata  
282 is the best documented function of allatostatins (Woodhead et al., 1989; 1993; Lorenz et al.,  
283 1995). These neuropeptides were isolated for the first time from the brain extracts of the  
284 cockroach *Diploptera punctata* (Pratt et al., 1989; Woodhead et al., 1989). However, Skinner  
285 et al. (1997) demonstrated that allatostatins are also present in and synthesized by cockroach

286 granular haemocytes. In addition, Garside et al. (1997) showed that allatostatins are rapidly  
287 degraded in haemolymph. According to Hoffmann et al. (1999) these findings could suggest  
288 that allatostatin-containing haemocytes are acting locally e.g. to regulate specific functions of  
289 other haemocytes, but to this day, the action of these peptides on cellular and humoral  
290 immune responses in insects remains to be elucidated.

291 Goldsworthy et al. (2002, 2003) studied *in vivo* interactions between the locust endocrine and  
292 immune systems in relation to nodule formation and the activation of the prophenoloxidase  
293 cascade in haemolymph. They showed, for the first time, the immunostimulatory effects of  
294 co-injection of adipokinetic hormone-I (*Lom*-AKH-I, AKH) with microbial cells components  
295 such as  $\beta$ -1,3 glucan or bacterial lipopolysaccharide (LPS) in haemolymph of *Locusta*  
296 *migratoria*. Such co-injection prolonged or facilitated phenoloxidase activation in  
297 haemolymph of adult locust. It also increased nodule formation in a dose-dependent manner  
298 and in a very defined pattern reflecting the distribution of reticular cells. Goldsworthy et al.  
299 (2003) also suggest that in *L. migratoria* the recruitment of haemocytes from haemopoietic  
300 tissue occurs in response to injections of LPS. Otherwise, the number of haemocytes in  
301 haemolymph would drop dramatically and it would severely limit further nodule formation.

302 In conclusion, our study shows for the first time that *Neb*-colloostatin is a peptide  
303 hormone that exerts pro-apoptotic activity on insect haemocytes. Injection of *Neb*-colloostatin  
304 in physiological concentrations results in significant hemocytotoxicity and a marked increase  
305 in apoptotic activity in haemocytes. Apoptosis induced by *Neb*-colloostatin may have  
306 important implications for the insect's immune defence, resulting in weakening of the  
307 immune system due to loss of the haemocyte activity. However, the molecular mechanism  
308 underlying the activation of the apoptotic programme in haemocytes by *Neb*-colloostatin  
309 remains unknown and requires further studies. On the other hand, the obtained results suggest  
310 the physiological concentrations of *Neb*-colloostatin could play an important role in the  
311 control of haemocytic activity in haemolymph of insects.

312

### 313 **FUNDING**

314 This work was supported by the Polish Ministry of Science and Higher Education  
315 [grant numbers N N204085638, N N309066739].

316

### 317 **REFERENCES**

318 **Aladaileh, S., Nair, S.V. and Raftos, D.A.** (2008). Effects of noradrenaline on  
319 immunological activity in Sydney rock oysters. *Dev.Comp. Immunol.* **32**, 627–636.

320 **Baines, D., Desantis, T. and Downer, R.G.H.** (1992). Octopamine and 5-hydroxytryptamine  
321 enhance the phagocytic and nodule formation activities of cockroach (*Periplaneta americana*)  
322 haemocytes. *J. Insect Physiol.* **38**, 905–14.

323 **Biederbick, A., Kern, H.F. and Elsasser, H.P.** (1995). Monodansylcadaverine (MDC) is a  
324 specific *in vivo* marker for autophagic vacuoles. *Eur. J. Cell Biol.* **66**, 3-14.

325 **Bylemans, D., Proost, P., Samijn, B., Borovsky, D., Grauwels, L., Huybrechts, R., Van**  
326 **Damme, J., Van Beeumen, J. and De Loof, A.** (1995). *Neb*-colloostatin, a second  
327 folliculostatins of the grey fleshfly, *Neobellieria bullata*. *Eur. J. Biochem.* **228**, 45-49.

328 **Cunningham, C.C.** (1995). Actin polymerization and intracellular solvent flow in cell  
329 surface blebbing. *J. Cell Biol.* **129**, 1589-1599.

330 **De Loof, A., Bylemans, D., Schoofs, L., Janssen, I., Spittaels, K., Vanden Broeck, J.,**  
331 **Huybrechts, R., Borovsky, D., Hua, Y.J. Koolman, J. et al. (1995)** Folliculostatins,  
332 gonadotropins and a model for control of growth in the grey fleshfly, *Neobellieria*  
333 (*Sarcophaga*) *bullata*. *Insect Biochem. Mol. Biol.* **25**, 661-667.

334 **Fields, G.B. and Noble, R.L.** (1990). Solid phase peptide synthesis utilizing 9-  
335 fluorenylmethoxycarbonyl amino acids. *Int. J. Peptide Protein Res.* **35**, 161-214.

336 **Franchini, A., Miyan, J.A. and Ottaviani, E.** (1996). Induction of ACTH- and TNF-alpha-  
337 like molecules in the hemocytes of *Calliphora vomitoria* (Insecta, Diptera). *Tissue Cell* **28**,  
338 587-592.

339 **Franssens, V., Simonet, G., Bronckaers, A., Claeys, I., De Loof, A. and Vanden Broeck,**  
340 **J.** (2005). Eicosanoids mediate the laminarin induced nodulation response in larvae of the  
341 flesh fly, *Neobellieria bullata*. *Arch. Insect Biochem. Physiol.* **59**, 32–41.

342 **Franssens, V., Smagghe, G., Simonet, G., Claeys, I., Breugelmans, B., De Loof, A. and**  
343 **Vanden Broeck, J.** (2006). 20-Hydroxyecdysone and juvenile hormone regulate the  
344 laminarin-induced nodulation reaction in larvae of the flesh fly, *Neobellieria bullata*. *Dev.*  
345 *Comp. Immunol.* **30**, 735–740.

346 **Fulda, S., Gorman, A., Hori, O. and Samali, A.** (2010). Cellular stress response: cell  
347 survival and cell death. *Int. J. Cell Biol.* 214074. (doi:10.1155/2010/214074).

348 **Garside, C.S., Hayes, T.K. and Tobe, S.S.** (1997). Degradation of Dip-allatostatins by  
349 hemolymph from the cockroach, *Diploptera punctata*. *Peptides* **18**, 17-25.

350 **Goldsworthy, G., Chandrakant, S. and Opoku-Ware, K.** (2003a). Adipokinetic hormone  
351 enhances nodule formation and phenoloxidase activation in adult locusts injected with  
352 bacterial lipopolysaccharide. *J. Insect Physiol.* **49**, 795–803.

353 **Goldsworthy, G., Mullen, L., Opoku-Ware, K. and Chandrakant, S.** (2003b). Interactions  
354 between the endocrine and immune systems in locusts. *Physiol. Entomol.* **28**, 54–61.

355 **Goldsworthy, G., Opoku-Ware, K. and Mullen, L.** (2002). Adipokinetic hormone enhances  
356 laminarin and bacterial lipopolysaccharide induced activation of the prophenoloxidase  
357 cascade in the African migratory locust, *Locusta migratoria*. *J. Insect Physiol.* **48**, 601–608.

358 **Gores, G.J., Herman, B. and Lemasters, J.J.** (1990). Plasma membrane bleb formation and  
359 rupture: a common feature of hepatocellular injury. *Hepatology* **4**, 609-698.

360 **Gourlay, C.W., Carpp, L.N., Timpson, P., Winder, S.J. and Ayscough K.R.** (2004). A  
361 role for the actin cytoskeleton in cell death and aging in yeast. *J. Cell Biol* **164**, 803–809.

362 **Hoffmann, K.H., Meyering-Vos, M. and Lorenz, M.W.** (1999). Allatostatins and  
363 allatotropins: Is the regulation of corpora allata activity their primary function? *Eur. J.*  
364 *Entomol.* **96**, 255-266.

365 **Huot, J., Houle, F., Rousseau, S., Deschesnes, R.G., Shah, G.M. and Landry, J.** (1998).  
366 SAPK2/p38-dependent F-actin reorganization regulates early membrane blebbing during  
367 stress-induced apoptosis. *J. Cell Biol.* **143**, 1361–1373.

368 **Kuczer, M., Rosiński, G. and Konopińska, D.** (2007). Insect gonadotropic peptides  
369 hormones: some recent developments. *J. Peptide Sci.* **13**, 16-26.

370 **Lanot, R., Zachary, D., Holder, F. and Meister, M.** (2001). Post-embryonic hematopoiesis  
371 in *Drosophila*. *Dev. Biol.* **230**, 243–57.

372 **Lavine, M.D. and Strand, M.R.** (2002). Insect hemocytes and their role in immunity. *Insect*  
373 *Biochem. Mol. Biol.* **32**, 1295-1309.

374 **Lee, J.U., Hosotani, R., Wada, M., Doi, R., Kosiba, T., Fujimoto, K., Mori, C.,**  
375 **Nakamura, N., Shiota, K. and Imamura, M.** (1997). Mechanism of apoptosis induced by  
376 cisplatin and VP16 in PANC-1 cells. *Anticancer Res.* **17**, 3445-3450.

377 **Lorenz, W.M., Kellner, R. and Hoffmann, K.H.** (1995). Identification of two allatostatins  
378 from the cricket, *Gryllus bimaculatus* de Geer (Ensifera, Gryllidae): additional members of a  
379 family of neuropeptides inhibiting juvenile hormone biosynthesis. *Regul. Pept.* **57**, 227-236.

380 **Ludwig, D. and Fiore, C.** (1960). Further studies on the relationship between parental age  
381 and the life cycle of the mealworm, *Tenebrio molitor*. *Ann. Entomol. Soc. Am.* **53**, 595-600.

382 **Ludwig, D., Fiore, C. and Jones, R.** (1962). Physiological comparison between offspring of  
383 the yellow mealworm, *Tenebrio molitor*, obtained from young and from old parents. *Ann.*  
384 *Entomol. Soc. Am.* **55**, 439-442.

385 **Mills, J.C., Stone, N.L., Erhardt, J. and Pittmann, R.N.** (1998). Apoptotic membrane  
386 blebbing is regulated by myosin light chain phosphorylation. *J. Cell Biol.* **140**, 627-636.

387 **Nicholson, D.W.** (1999). Caspase structure, proteolytic substrates and function during  
388 apoptotic cell death. *Cell Death Differ.* **6**, 1028-1042.

389 **Pratt, G.E., Farnsworth, D.E., Siegel, N.R., Fok, K.F. and Feyereisen, R.** (1989).  
390 Identification of an allatostatin from adult *Diploptera punctata*. *Biochem. Biophys. Res.*  
391 *Commun.* **163**, 1243-1247.

392 **Rantala, M.J., Vainikka, A. and Kortet, R.** (2003). The role of juvenile hormone in  
393 immune function and pheromone production trade-offs: a test of the immunocompetence  
394 handicap principle. *Proc. R. Soc. Lond. B* **270**, 2257–2261.

395 **Rosinski, G.** (1995). Metabolic and myotropic neuropeptides of insects. *Zool. Series* **22**, 148  
396 pp. A. Mickiewicz University Press. Poznan.

397 **Rosinski, G., Wrzeszcz, A. and Obuchowicz, L.** (1979). Differences in trehalase activity in  
398 the intestine of fed and starved larvae of *Tenebrio molitor* L. *Insect Biochem.* **9**, 485-488.

399 **Skinner, J.R., Fairbairn, S.E., Woodhead, A.P., Bendena, W.G. and Stay, B.** (1997).  
400 Allatostatin in hemocytes of the cockroach *Diploptera punctata*. *Cell Tissue Res.* **290**, 119-  
401 128.

402 **Sorrentino, R.P., Carton, Y. and Govind, S.** (2002). Cellular immune response to parasite  
403 infection in the *Drosophila* lymph gland is developmentally regulated. *Dev. Biol.* **243**, 65–80.

404 **Terahara, K., Takahashi, K.G. and Mori, K.** (2003). Apoptosis by RGD-containing  
405 peptides observed in hemocytes of the Pacific oyster, *Crassostrea gigas*. *Dev. Comp.*  
406 *Immunol.* **27**, 521-528.

407 **Verheij, M., Bose, R., Lin, X.H., Yao, B., Jarvis, W.D., Grant, S., Birrer, M.J., Szabo, E.,**  
408 **Zon, L.J., Kyriakis, J.M., et al.** (1996). Requirement for ceramide-initiated SAPK/JNK  
409 signalling in stress-induced apoptosis. *Nature* **380**, 75-79.

410 **Wasielewski, O. and Rosinski, G.** (2007). Gonadoinhibitory effects of *Neb*-colloostatin and  
411 *Neb*-TMOF on ovarian development in the mealworm, *Tenebrio molitor* L. *Arch. Insect*  
412 *Biochem. Physiol.* **64**, 131-141.

413 **Woodhead, A.P., Asano, W.Y. and Stay, B.** (1993). Allatostatins in the haemolymph of  
414 *Diploptera punctata* and their effect in vivo. *J. Insect Physiol.* **39**, 1001-1005.

415 **Woodhead, A.P., Stay, B., Seidel, S.L., Khan, M.A. and Tobe, S.S.** (1989). Primary  
416 structure of four allatostatins: neuropeptide inhibitors of juvenile hormone synthesis. *Proc.*  
417 *Nat. Acad. Sci. USA* **86**, 5997-6001.

418 **Zanke, B.W., Boudreau, K., Rubie, E., Winnett, E., Tibbles, L.A., Zon, L., Kyriakis, J.,**  
419 **Liu, F.F. and Woodgett, J.R.** (1996). The stress activated protein kinase pathway mediates

420 cell death following injury induced by cis-platinum, UV irradiation or heat. *Curr. Biol.* **6**,  
421 606-613.

422

### 423 **FIGURE LEGENDS**

424 Fig. 1. Fluorescence and confocal microscopy images showing induced apoptosis in *T.*  
425 *molitor* haemocytes following *Neb*-colloostatin injections. A-C: morphological, apoptotic and  
426 cytoskeletal changes in haemocytes 1 hour after saline (control; A) and 1 nmole of *Neb*-  
427 colloostatin injection (B-C). All haemocytes were stained with SR-VAD-FMK reagent for  
428 caspase activity detection (red color), with Oregon-Green-phalloidin for staining of the F-  
429 actin cytoskeleton (green color) and with Hoechst-33258 for DNA staining (blue color).  
430 Arrows show aggregation of F-actin, visible as highly staining foci (B) and membrane blebs  
431 (C). Haemocytes of insects injected with peptide were less able to form filopodia in  
432 comparison to the control cells. (D-F): caspase activity and membrane blebbing in  
433 haemocytes 1 hour after injection of saline (control; D) and *Neb*-colloostatin in a dose of 1 (E)  
434 and 10 nmole/insect (F). The cells were stained with SR-VAD-FMK reagent for detection of  
435 caspase activity (red color). Many apoptotic bodies are observed in (E) or (F). Arrows show  
436 membrane blebbing. G-H: mitochondrial membrane depolarization caused by the *Neb*-  
437 colloostatin injections. In the control haemocytes, active mitochondria (G) stained with  
438 MitoTracker Green FM exhibit bright green fluorescence. Injection of 1 nmole of *Neb*-  
439 colloostatin causes depolarization of mitochondrial membranes as visualized by the inhibition  
440 of the uptake of MitoTracker Green FM (H). Scale bars indicate 20  $\mu\text{m}$ .

441

442 Fig. 2. Confocal microscopy images showing the *in vitro* *Neb*-colloostatin-induced apoptotic  
443 effects in *T. molitor* haemocytes. A-B: apoptotic changes in haemocytes 1 hour after  
444 incubation in saline (control; A) and after 1 nmole of *Neb*-colloostatin treatment. The control  
445 (A) and the *Neb*-colloostatin-treated haemocytes (B) were stained with SR-VAD-FMK  
446 reagent for detection of active caspases (red color). Arrows show membrane blebs (B). Scale  
447 bars indicate 20  $\mu\text{m}$ .

448

449

450



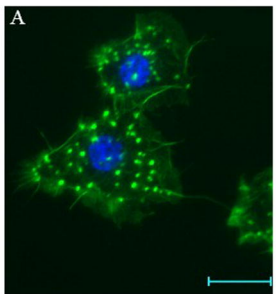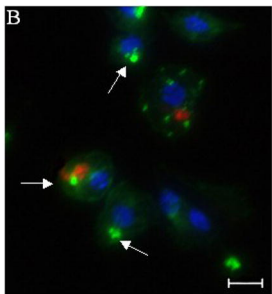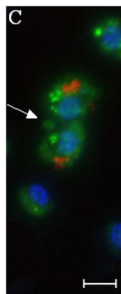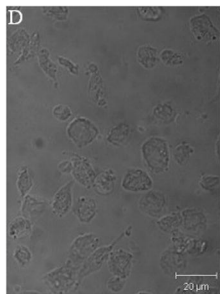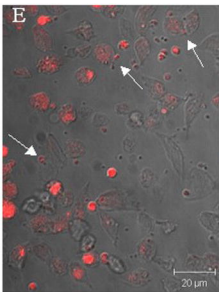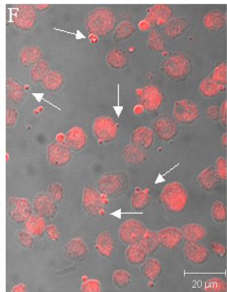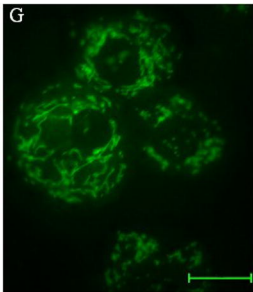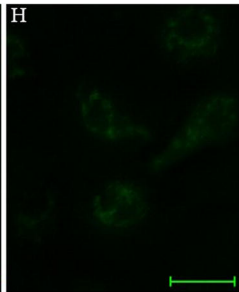



**A**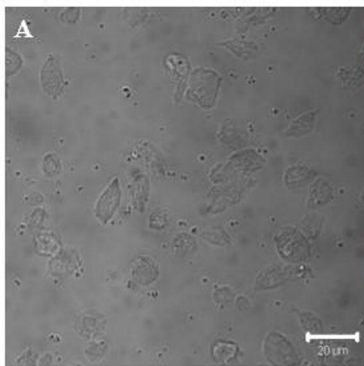**B**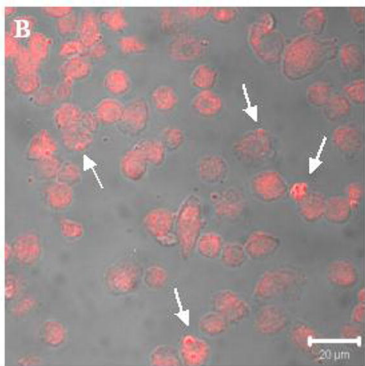

Source: https://cob.silverchair.com/jeb/article-pdf/doi/10.1242/jeb.072579/2036050/jeb_072579.pdf
